# Supplementary material
Source: Research Square preprint supplement (doi:10.21203/rs.3.rs-10308293/v1)
Supplement: Supplementary file 2 [file 9eaf8b0e9b7cc31a6c54ef50.docx]

# Supplementary information

Online Resource 1 includes seven internal sections: S1, data construction and missingness audit; S2, metadata and data dictionary; S3, de-identified detailed case-record structure; S4, robustness and sensitivity materials; S5, AuthorshipTrack software information; S6, software user guide and procedural manual; and S7, ethics and data-governance documentation.

Online Resource 1 contains the combined supplementary materials for this article. The main manuscript is designed to be self-contained: it presents the research problem, five-signal methodological framework, operational formulae, evidence-layer design, core validation results, interpretive boundaries and conclusion. Online Resource 1 strengthens transparency, auditability and reuse; it is not required for the article to form a complete argument.
